# Supplementary material for: New structures of bilayer germanium nanosheets predicted by a particle swarm optimization method
Source: Royal Society of Chemistry journal article supplement (doi:10.1039/c6nr03672d), 2016-01-01
Supplement: c6nr03672d1.pdf [file c6nr03672d1.pdf]

## Supplement material

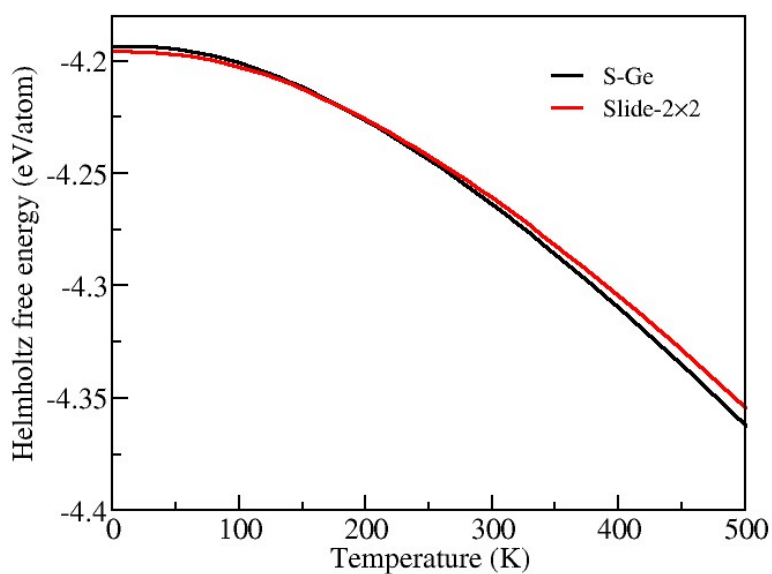

**Fig. S1** Helmholtz free energy of S-Ge and slide-2×2 with respect to temperature.

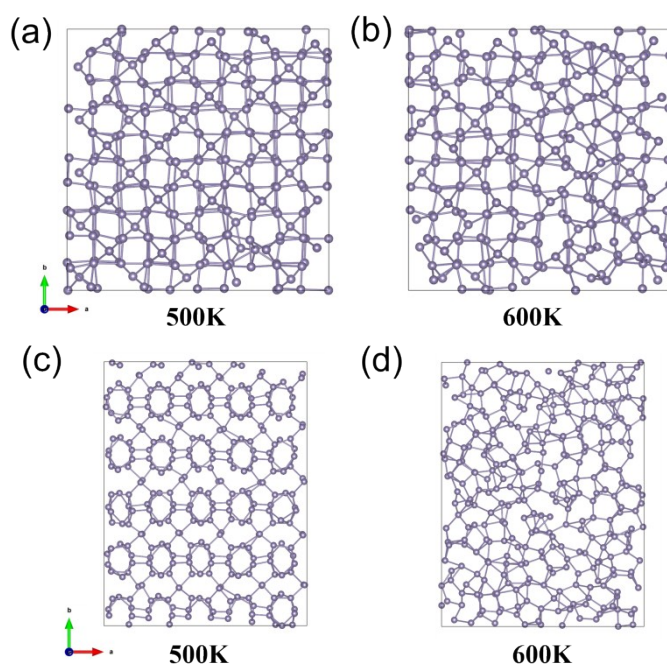

**Fig. S2.** Snapshots of S-Ge and P-Ge at the end of two independent 10 ps AIMD simulations: (a) S-Ge, (b) P-Ge. The time step is 2 fs.
